# Supplementary material for: Excitation energy transfer from non-aggregated molecules to perylenediimide nanoribbons via ionic interactions in water
Source: Royal Society of Chemistry journal article supplement (doi:10.1039/c2jm31661g), 2012-01-01
Supplement: c2jm31661g.pdf [file c2jm31661g.pdf]

## Supplementary Information

# Excitation energy transfer from non-aggregated molecules to perylene-3,4,9,10-tetracarboxylic diimide nanoribbons via ionic interactions in water

Mustafa Supur,<sup>a</sup> Yusuke Yamada<sup>a</sup> and Shunichi Fukuzumi<sup>\*,a,b</sup>

<sup>a</sup>Department of Material and Life Science, Graduate School of Engineering, Osaka University, ALCA, Japan Science and Technology Agency (JST), Suita, Osaka 565-0871, Japan

<sup>b</sup>Department of Bioinspired Science, Ewha Womans University, Seoul 120-750, Korea

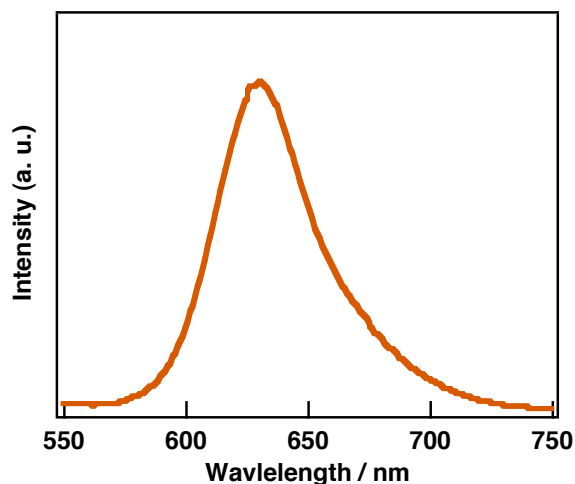

**Fig. S1** Emission spectrum of PDI nanoribbons,  $\lambda_{\text{exc}} = 530$  nm.

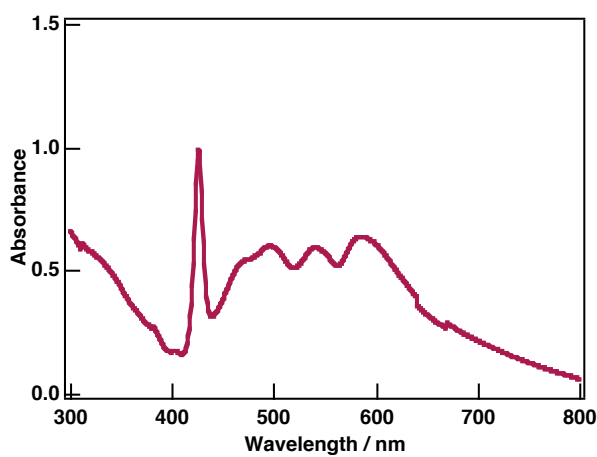

**Fig. S2** Absorption spectrum of ZnTPPSK<sub>4</sub> in the presence of PDI nanoribbons in water containing 0.10 M MTAB.

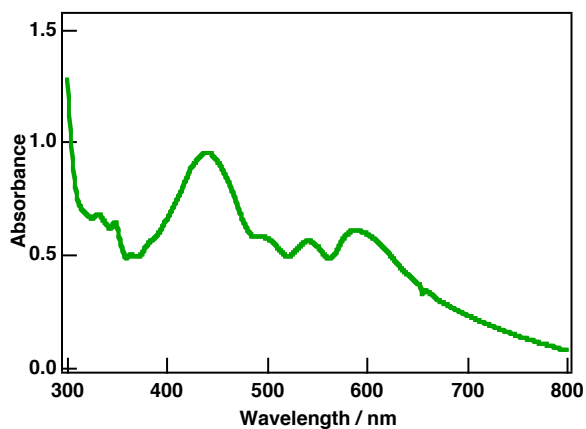

**Fig. S3** Absorption spectrum of LY in the presence of PDI nanoribbons in water containing 0.10 M MTAB.

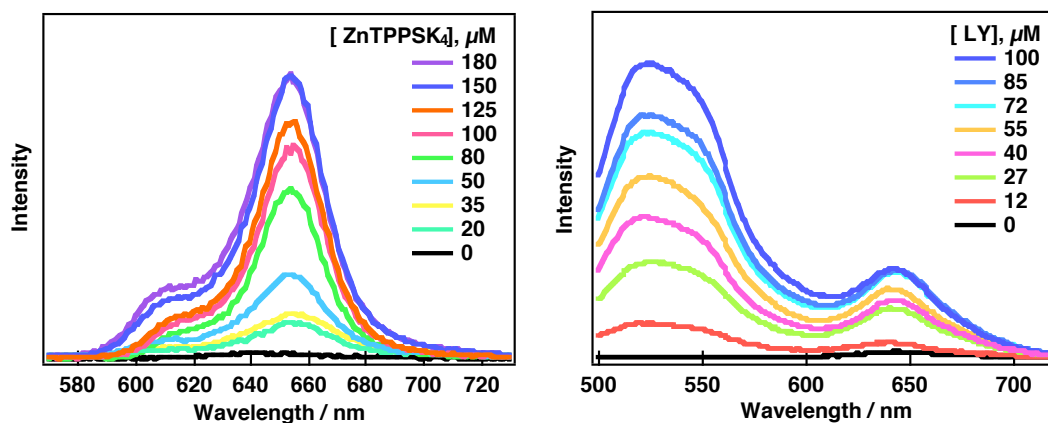

**Fig. S4** Emission spectra obtained by the titration of PDI aggregates (ca. 1.2 mg/ml) with ZnTPPSK<sub>4</sub> (left) and LY (right) in water containing 0.10 M MTAB,  $\lambda_{\text{exc}} = 427$  nm.

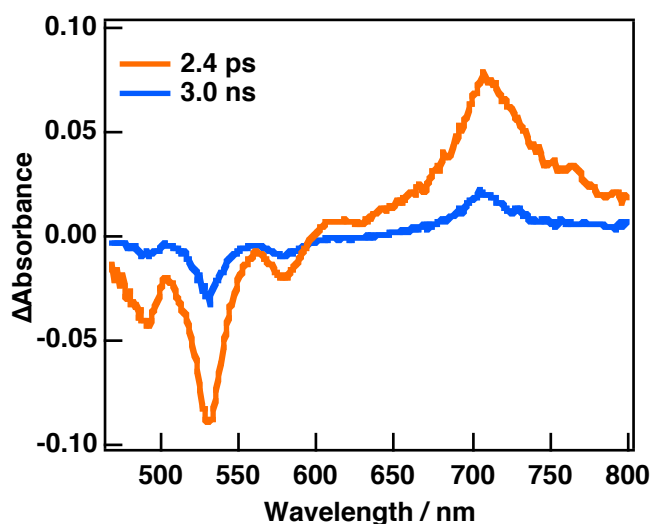

**Fig. S5** Femtosecond transient absorption spectra of PDI in chloroform at selected time delays,  $\lambda_{\text{exc}} = 390$  nm.
